# Supplementary material for: The Predictive efficacy of tumor mutational burden for immune Checkpoint Inhibitors in non-small cell lung cancer: A systematic review and meta-analysis of randomized controlled trials
Source: Research Square preprint supplement (doi:10.21203/rs.3.rs-7114203/v1), 2025-08-20
Supplement: Supplementary file 1 [file 333c11fabbbf9d733e1b2afe.docx]

Table S2. NOS assessment of the included trials

| **Study** | **S1** | **S2** | **S3** | **C** | **O1** | **O2** | **O3** | **O4** | **Total score** |
| --- | --- | --- | --- | --- | --- | --- | --- | --- | --- |
| Carbone 2017 | 1 | 1 | 1 | 1 | 1 | 0 | 1 | 1 | 7 |
| De Castro 2023 | 1 | 1 | 1 | 1 | 2 | 0 | 1 | 1 | 8 |
| Gandara 2018 (POLAR  and OAK) | 1 | 1 | 1 | 1 | 1 | 0 | 1 | 1 | 7 |
| Garassino 2023(Keynote  189 and 407 ) | 1 | 1 | 1 | 1 | 2 | 1 | 1 | 1 | 9 |  |
| Gettinger 2021 | 1 | 1 | 1 | 1 | 1 | 0 | 1 | 1 | 7 |
| Herbst 2021 | 1 | 1 | 1 | 1 | 1 | 0 | 1 | 1 | 7 |
| Jiang 2022 | 1 | 1 | 1 | 1 | 1 | 1 | 1 | 1 | 8 |
| Leighl 2022 | 1 | 1 | 1 | 1 | 2 | 0 | 1 | 1 | 8 |
| Rizvi 2020 | 1 | 1 | 1 | 1 | 2 | 0 | 1 | 1 | 8 |
| Wang 2023 | 1 | 1 | 1 | 1 | 1 | 1 | 1 | 1 | 8 |
| Duan 2023 | 1 | 1 | 1 | 1 | 1 | 0 | 1 | 1 | 7 |
| Hayashi 2022 | 1 | 1 | 1 | 1 | 2 | 0 | 1 | 1 | 8 |
| Hellmann 2018 | 1 | 1 | 1 | 1 | 1 | 0 | 1 | 1 | 7 |

S1: Representativeness of the exposed cohort; S2: Selection of the non-exposed cohort; S3: Ascertainment of exposure; C: Outcome of interest not present at start of study; O1: Comparability of cohorts; O2: Assessment of outcome; O3: Follow-up long enough; O4: Adequacy of follow up of cohorts.
